# Supplementary material
Source: MDPI journal article supplement (https://www.mdpi.com/2227-9717/10/3/515)
Supplement: s1 [file s1]

## Supplementary Material

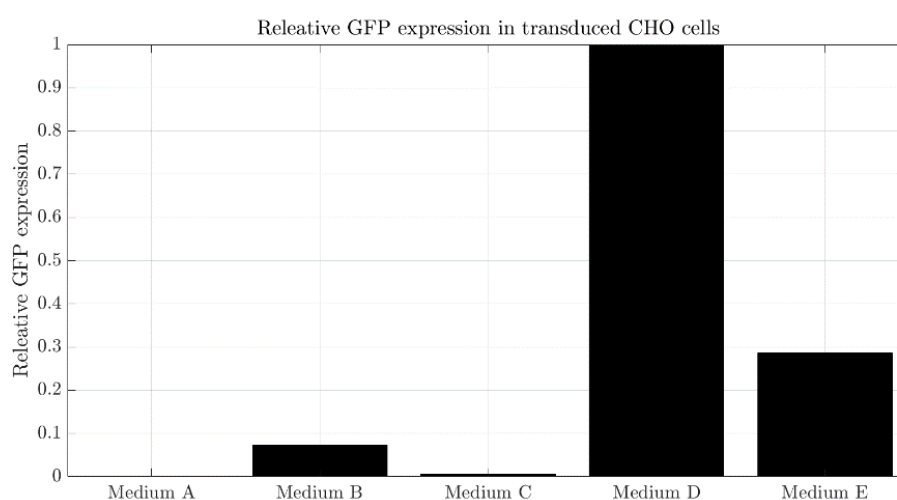

**Figure S1.** Selection of transfection medium among media A, ..., E in static in tissue culture T-25 flasks with a total end volume of 7 mL and a total DNA mass of 80  $\mu$ g, based on transduction in CHO cells of the material collected from transfected cultures—GFP expression relative to the highest level obtained in medium D.
